1 MetaConnect, a new platform for population viability modelling to assist decision makers in  
2 conservation and urban planning

3

4 Sylvain Moulherat<sup>a,b</sup>, Elvire Bestion<sup>a</sup>, Michel Baguette<sup>a,c</sup>, Matthieu Moulherat<sup>b</sup>, Stephen C.F.  
5 Palmer<sup>d</sup>, Justin M.J. Travis<sup>d</sup>, Jean Clobert<sup>a</sup>

6

7 <sup>a</sup> SEEM-CNRS, 2 route du CNRS, 09200 Moulis, France

8 <sup>b</sup> TerrOïko, 2 rue Clémence Isaure, 31250 Revel, France

9 <sup>c</sup> Museum National d'Histoire Naturelle, UMR 7205 Institut Systématique Evolution  
10 Biodiversité, F-75005 Paris, France

11 <sup>d</sup> Institute of Biological and Environmental Sciences, University of Aberdeen Zoology  
12 Building, Tillydrone Avenue, Aberdeen, AB24 2TZ, UK.

13

14 Corresponding author:

15 Sylvain Moulherat: [sylvain.moulherat@terroiko.fr](mailto:sylvain.moulherat@terroiko.fr). 2 rue Clémence Isaure, 31250 Revel,  
16 France. Tel./Fax: +33 (0)5 81 60 06 96.

17

18 Word count: 6987

19

1 Abstract:

2 In a context of global change, scientists and policy-makers require tools to address the issue  
3 of biodiversity loss. Population viability analysis (PVA) has been the main tool to deal with  
4 this problem. However, the tools developed during the 90s poorly integrate recent scientific  
5 advances in landscape genetics and dispersal. We developed a flexible and modular modelling  
6 platform for PVA that addresses many of the limitations of existing software. MetaConnect is  
7 an individual-based, process-based and PVA-oriented modelling platform which could be  
8 used as a research or a decision-making tool. Here, we present the core base modelling of  
9 MetaConnect. We demonstrate its potential use through a case study illustrating the  
10 platform's capability for performing integrated PVA including extinction probability  
11 estimation, genetic differentiation and landscape connectivity analysis. We used MetaConnect  
12 to assess the impact of infrastructure works on the natterjack toad metapopulation functioning.

13

14 Keywords:

15 Modelling platform, individual-based model, process-based model, decision-making tool,  
16 dispersal, landscape genetics, landscape planning

## 1 Introduction:

2 In a context of rapid global change, habitat loss and habitat fragmentation have become the  
3 major threats to biodiversity (IUCN 2013), and have been considered for some time as the  
4 principal cause of species extinction (Dobson, Bradshaw & Baker 1997; Millenium  
5 Ecosystem Assessment 2005). They have consequences from the ecosystem (Fahrig 2003;  
6 Cardinale *et al.* 2012; de Mazancourt *et al.* 2013) to the genetic scale (Ingvarsson 2001;  
7 Baguette *et al.* 2013) by modifying landscape patterns in a four-step process: reduction in  
8 amount of habitat, increase in number of habitat patches, decrease patch sizes and increase in  
9 patch isolation (Fahrig 2003). This alteration of landscape patterns has diverse effects on  
10 population dynamics (e.g. Baguette *et al.* 2013). As patches become smaller, the size of the  
11 population supported decreases; this can increase stochastic risk of extinction from  
12 demographic processes (Legendre *et al.* 1999; Reed *et al.* 2002), but also from genetic  
13 stochasticity: small populations are more subjected to risk of inbreeding and consanguinity  
14 depression (Brook *et al.* 2002b), loss of genetic diversity and mutational accumulation (Rowe  
15 & Beebee 2003), leading to the extinction vortex (Gilpin & Soulé 1986; Fagan & Holmes  
16 2006). Moreover, by increasing inter-patch distances and therefore dispersal cost, habitat loss  
17 and fragmentation decrease the probability of individuals moving between sub-populations.  
18 This can hinder recolonization or the demographic rescue of patches where sub-populations  
19 have become extinct, or declining, potentially leading to stochastic extinction of  
20 metapopulations (Fahrig 2003). Furthermore, by reducing gene flow between sub-  
21 populations, isolation can lead to genetic differentiation of sub-populations and impede  
22 genetic rescue of highly inbred sub-populations (Ingvarsson 2001; Keller & Waller 2002;  
23 Tallmon, Luikart & Waples 2004).

24 Historically, an ecological tool much used by scientists and conservation managers was  
25 population viability analysis (PVA), which aims at estimating extinction or quasi-extinction

1 probability of a species (Boyce 1992; Legendre & Clobert 1995; Beissinger & Westphal  
2 1998) and which was used to inform conservation programs (Southgate & Possingham 1995;  
3 Ferriere *et al.* 1996; Letcher *et al.* 1998; Schtickzelle & Baguette 2004; Radchuk *et al.* 2013).  
4 Most of the PVA models focused on species population dynamics (Lindenmayer *et al.* 1995;  
5 Brook *et al.* 1999; Legendre *et al.* 1999), and offered limited flexibility regarding population  
6 genetics (but see Lacy, Borbat & Pollak 2009) or metapopulation functioning (Reed *et al.*  
7 2002; Pe'er *et al.* 2013). PVA is principally focused on demographic and genetic processes  
8 and individual movement behaviour determining species persistence (Keller & Waller 2002;  
9 Fahrig 2003; Piou & Prevost 2012; Frank & Baret 2013; Noel, Machon & Robert 2013).  
10 Population genetics has made major advances during recent decades, and it is now possible to  
11 identify at generation  $g$  those individuals that are offspring of individuals immigrating at  
12 generation  $g-1$ ; and assign these immigrants to their original population (Beerli & Felsenstein  
13 2001). Besides, the rise of landscape genetics allows the assessment and quantification of how  
14 landscape elements affect gene flow in a metapopulation (Manel *et al.* 2003; Manel &  
15 Holderegger 2013). Integrating both population and landscape genetics approaches in models  
16 of metapopulation functioning to support conservation managers' and policy makers' plans  
17 should be highly valuable (Baguette *et al.* 2013; Pe'er *et al.* 2013).

18 The growth of a community of ecological modellers using individual-based models (IBMs)  
19 rather than the mathematical approaches has led to the production of a huge number of models  
20 (DeAngelis & Mooij 2005) and metrics (Moilanen & Nieminen 2002; Calabrese & Fagan  
21 2004). Moreover, most such models were developed to answer specific questions, which  
22 renders comparison between outputs difficult, if not impossible (DeAngelis & Mooij 2005;  
23 Kindlmann & Burel 2008; Pe'er *et al.* 2013), and their application inefficient out of the  
24 narrow context for which each was typically developed (Grimm *et al.* 2004; Kindlmann &  
25 Burel 2008). Generic PVA modelling platforms built from IBM and process-based modelling

1 are lacking (but see Grimm *et al.* 2004; Lacy, Borbat & Pollak 2009; Bocedi *et al.* 2014) or do  
2 not permit a sufficient level of flexibility (VORTEX is spatially implicit, RangeShifter and  
3 MetaX have limited demographic modules) to deal with a large spectrum of conceptual  
4 framework and ecological themes (DeAngelis & Mooij 2005; Evans, Norris & Benton 2012;  
5 Evans *et al.* 2013; Purves *et al.* 2013).

6 Because PVA is a relevant basic decision-making tool (Brook *et al.* 2000; Brook *et al.* 2002a;  
7 Pe'er *et al.* 2013), we developed MetaConnect, a generic PVA-based IBM following the  
8 Beissinger & Westphal (1998) framework, which allows the design of a range of models from  
9 very simple to highly detailed and which integrates demography and genetics in a spatially-  
10 explicit context (Baguette *et al.* 2013). MetaConnect not only aims at performing traditional  
11 PVAs based on demographic data, but also integrates the recent development of population  
12 and landscape genetics, which allows the assessment of functional connectivity (*sensu* Taylor,  
13 Fahrig & With 2006). We expect that this integrated modelling platform will be a useful tool  
14 for scientists, conservation managers and policy makers. Here we present MetaConnect's core  
15 base modelling, its validation (Appendix A) and present a case study demonstrating its use to  
16 assess the impact of infrastructure development on the population viability, genetic  
17 differentiation and functional connectivity of existing populations of the endangered  
18 natterjack toad (*Epidalea calamita*).

19

## 20 Model

### 21 Model design

22

23 MetaConnect simulates metapopulation dynamics and genetics using the species life cycle  
24 and life history traits, the landscape characteristics and their interactions. The simulations

1 allow inferring of individual dispersal and local and global extinction probabilities, genetic  
2 diversity and genetic differentiation (from classical Fst analyses or as input files for the  
3 Structure software (Pritchard, Stephens & Donnelly 2000)).

4 MetaConnect is an individual- and process-based model which means that:

- 5 • all individuals in the model are independent and behave in respect to their  
6 phenotype.
- 7 • patterns emerging in the different outputs of the model are the products of flexible  
8 and adjustable rules implemented in the model.

9 Model structure

10

11 *Landscape*

12

13 The landscape is imported as two shapefiles and then rasterized by MetaConnect.

- 14 • Patches: locates suitable habitats for the focal species. The carrying capacity  
15 (individual/m<sup>2</sup>) can be assumed to be constant, or an optional shapefile of  
16 carrying capacities can be provided.
- 17 • Costs: provides a coefficient (of rugosity) representing the ability of a given  
18 species to move through each habitat type of the landscape. The higher the cost,  
19 the harder to cross.

20

21 *Demography*

22

23 Population dynamics is represented by a succession of individual states linked by transitions.

24 The user builds the species life-cycle by assembling “bubbles” representing the individual

1 state and “arrows” representing transition rules between individual states (Figure 1, 2). The  
2 “bubbles”, hereafter regarded as classes, correspond to age classes, sex or anything that can be  
3 defined as a group of individuals with the same demographic characteristics. Density  
4 dependence can be scramble or contest and designed as a part of transitions. The mating  
5 system can be chosen from monogamy, polygamy, polyandry and/or polygyny (Legendre *et*  
6 *al.* 1999). The demographic parameters (Table 1) can be patch-specific. Environmental  
7 stochasticity has been included as random processes inducing normal variation around the  
8 patch’s mean value of demographic parameters truncated to realistic values set by the user. As  
9 an example, the fecundity parameter follows a Poisson distribution (demographic  
10 stochasticity) with parameter  $\lambda$  equal to the average fecundity ( $F \sim \mathcal{P}(\bar{F})$ ). The average  
11 fecundity can vary from one patch to another and within simulation time steps following a  
12 Gaussian distribution (Table 1).

13 Dispersal probability  $p_d$  is implemented by setting a proportion of individuals in a  
14 given class leaving a patch. The density-dependent recruitment probability  $p_r$  is determined  
15 by equation 1 where  $N_T$  can be a chosen combination of the number of individuals per class  
16 (i.e.  $N_T$  could be the total population or the number of individual in a given class) (Caswell  
17 2001).

18 Equation 1:

19 Contest: 
$$p_r = \frac{1}{1 + kN_T}$$

20 Scramble: 
$$p_r = e^{-kN_t}$$

21 Dispersal is age- and sex-dependent, and the process by which individuals disperse can be  
22 chosen from three families of movement rules:

- 1           • Dispersal between patches is modelled by a probability for an individual to reach  
2           another patch, ignoring rugosity coefficient. The probability of reaching a patch  
3           can be equal between patches, depend on the Euclidean distance between patches’  
4           centres, or be set manually.
- 5           • The interaction between individuals and their environment depends on rugosity  
6           coefficients. This family comprises a random-walk (RW) and a correlated  
7           random-walk rule (CRW). The CRW assumes a degree of directional persistence,  
8           (i.e. movement direction at time  $t+1$  depends on the direction taken at time  $t$ ) and  
9           not solely an environmental based one. Dispersing individuals benefit from a  
10          “energy gauge” decreasing at each step of the (C)RW in respect of the cell cost  
11          weighted by direction (1 for straight moves,  $\sqrt{2}$  for diagonal moves).
- 12          • This family of rules assumes that individuals have knowledge of their  
13          environment, and move by one of two methods. From a focal patch, the least cost  
14          path (LCP) algorithm usually assumes that a single patch can be reached (Botea,  
15          Müller & Schaeffer; Adriaensen *et al.* 2003; Pe'er & Kramer-Schadt 2008;  
16          Barraquand, Inchausti & Bretagnolle 2009). Such an assumption is unrealistic,  
17          and to relax it we implemented a multiple LCP movement rule, in which we  
18          calculated all possible LCPs between the focal patch and all other patches (Urban  
19          *et al.* 2009; Foltete, Clauzel & Vuidel 2012). Then, for reachable patches (i.e.  
20          LCP length less than the maximum dispersal distance), the probability to reach a  
21          patch is inversely weighted by the LCP length (number of map cells crossed) or  
22          cumulative cost (total cost of all map cells crossed). We also adapted the  
23          Stochastic Movement Simulator (SMS) (Palmer, Coulon & Travis 2011; Aben *et*  
24          *al.* 2014; Palmer, Coulon & Travis 2014; Coulon *et al.* Submitted), which relaxes  
25          the assumption of omniscience inherent in the LCP approach. With the SMS rule,



1 individuals make movement decisions based on the environment within a limited  
2 perceptual range and a tendency to directional persistence similar to that in a  
3 CRW. At each movement, the SMS algorithm calculates a movement probability  
4 for each cell surrounding the current cell based on the rugosity coefficient of the  
5 cells in the perceptual range (see Palmer, Coulon & Travis 2011 for details).

6 The dispersal event ends when the individual dies or reaches a patch different from his  
7 original patch regardless of the arrival patch quality.

8

### 9 *Genetics*

10

11 Individuals are genetically tagged using neutral polymorphic loci. The number of loci and  
12 number of alleles per locus can be specified by the user. A single mutation rate (a probability  
13 of creating a new allele without possibility of reverse mutation) implemented in the model  
14 allows the production of new alleles at each locus during simulations, and can be specified by  
15 the user. Gene transmission is assumed to be Mendelian and siblings are assumed to have the  
16 same father (randomly chosen from the female harem for polyandrous cases).

17

### 18 Model outputs

19

20 The model provides many forms of outputs based on focal species life history traits  
21 and landscape maps, which are adaptable to various theoretical and applied contexts. The  
22 outputs report the results at three levels at a frequency specified by the user, allowing  
23 dynamic visualization of the simulations:

- 1           • Demography: population size is split into the classes and sexes implemented in  
2           the model. The model derives extinction probability, colonization probability and  
3           time to extinction and colonization. These indicators are calculated at the local  
4           (patch) and global (metapopulation) scales.
- 5           • Dispersal: the model provides the number of individuals reaching a new patch or  
6           dying during dispersal. Maps of cell occupancy are drawn from successful  
7           dispersal events (number of individuals visiting each cell during the whole run).
- 8           • Genetics: genetic diversity and differentiation ( $F_{st}$ ,  $F_{is}$ ,  $F_{it}$ ,  $H_e$  and  $H_o$ ) at the  
9           local and/or global scale applicable to each statistic.

10 All these outputs can be directly plotted using the MetaConnect project manager (figure 2) or  
11 extracted as text files. In addition R (R Development Core Team 2005) has been incorporated  
12 to the project manager, which allows direct analysis of the outputs.

13

#### 14           Model sensitivity:

15

16 MetaConnect is a highly flexible and modular IBM, which means that dozens of variables can  
17 be specified in various modelling contexts, rendering global sensitivity analyses impossible to  
18 run (Cross & Beissinger 2001; Naujokaitis-Lewis *et al.* 2009; Pe'er *et al.* 2013). A thematic  
19 sensitivity analysis will be presented in the MetaConnect user manual, in which sensitivity of  
20 extinction probabilities, genetic structure and connectivity metrics will be analyzed in relation  
21 to the appropriate model parameters and their relative contribution to the sensitivity estimate  
22 (Cross & Beissinger 2001).

23

1 Case study: Changes in the metapopulation functioning of an existing natterjack  
2 toad population under scenarios of economic development.

3

4 *MetaConnect* parameterization

5

6 We used a model designed with MetaConnect to determine the potential impact of the  
7 development of an industrial area and a terrestrial transport infrastructure (high-speed  
8 railway), both alone and together, on the population viability of *Epidalea calamita*  
9 populations in south-western France close to Agen (44°11'36"N, 0°31'14"E) (figure 3).

10 Habitat patches were determined *a priori* based on expert assessment (figure 3). Preferences  
11 for landscape elements were derived from those experimentally determined by Stevens et al.  
12 (2006). *E. calamita* was assumed to disperse following the stochastic-movement-simulator  
13 (SMS) assumptions (Palmer, Coulon & Travis 2011; Coulon *et al.* Submitted). MetaConnect  
14 was parameterized with published values of life history traits (Stevens & Baguette 2008)  
15 (Appendix B).

16 We analysed MetaConnect genetic outputs for all the patches containing more than 10  
17 individuals at the end of each run of 100 time steps. This analysis was performed using  
18 STRUCTURE (Pritchard, Stephens & Donnelly 2000) with an admixture model assuming that  
19 the origin population of an individual is known and the allele frequencies are independent.  
20 STRUCTURE runs were performed for a variable number of clusters between 1 and 7, and  
21 with 10 iterations of 100000 steps (50000 burn-in and 50000 analysis steps to ensure model  
22 convergence). This procedure was reproduced for each iteration of the simulation of a given  
23 scenario. We determined the best number of genetic clusters following the Evanno method  
24 (see Evanno, Regnaut & Goudet 2005) using STRUCTURE HARVESTER (Earl & Vonholdt

1 2012). We counted the assignation of a patch to a cluster for each MetaConnect run analysed  
2 with STRUCTURE and tested the clustering robustness by performing a  $\chi^2$  test per patch.

3

#### 4 Current metapopulation functioning

5

6 Within the study site, (10 km around the industrial area development), the *E. calamita*  
7 population is not threatened (extinction probability  $p_e = 0$ ) and we observed two main  
8 dispersal corridors. The major corridor joins the north (quarry, patch 29 and 32) to the south  
9 (motorway, patch 103) and is stopped by the motorway in its southern part and by the  
10 Garonne River at its northern part. The minor corridor joins the quarry (east) to a pond (patch  
11 34, west) (figure 4.A). Our focal area covers these two corridors (figure 3). Both corridors  
12 incorporate stepping-stone sites (North-south: patches 50 and 67, east-west: patch 36) (figure  
13 4.A). Within the focal area all the patches have a very low extinction probability (see figure  
14 4), and except for patch 103, all patches are able to exchange individuals with all the others.  
15 Indeed, only patch 103 is unable to provide individuals to patches 34, 36, 29 and 32 or to  
16 receive individuals from patches 34 and 36.

17 The analysis of the genetic output suggests that currently the study site is divided into three  
18 separate clusters (all cluster differentiation p.values<0.05). The first one is situated at the  
19 north of the Garonne, the second between the Garonne and the motorway and the third at the  
20 south of the motorway (figure 5.A).

21

1                    Expected consequences of the industrial area and of the high-speed railway building

2

3                    The industrial area development and the associated destruction of patch 67 leads to a  
4 reduction of individual flow between patches to the north and south of the industrial area and  
5 to a population size reduction within the southern patches (figure 6.B). Such a modification  
6 would not threaten *E. calamita* persistence in the study site (all  $p_e = 0$ , figure 6.D). However,  
7 dispersal would be more concentrated between patches 29, 32 and 50 due to the repelling  
8 effect of the industrial area for *E. calamita* (figure 6.D). In addition, the reduction of dispersal  
9 along the north-south axis should lead to a fourth genetic cluster in the western part of the  
10 study sites (Figure 5.B).

11                    The high-speed railway project will fragment the study site landscape. This would lead to the  
12 reduction of patches 34 and 103 areas (since none of the newly created patches 45, 46 nor 112  
13 could shelter a population (Respectively  $p_e = 0.71, 0.71, 0.61$ , figure 6.E)) inducing the  
14 reduction of their sheltered population sizes (figure 6.C). In addition, dispersal along the  
15 north-south corridor is reduced to the south of the patch 50 (figure 6.C). Moreover, the  
16 connectivity along the north-south corridor is also decreased due to the population size  
17 reduction of patches 71 and 103. The reduction of the patch population size and the change in  
18 the connectivity along the north-south axis change the clustering outcome of these last  
19 simulations. Indeed, if the Evanno method suggests that 2 clusters can be identified, the  $\chi^2$  test  
20 shows that the assignation to a second cluster does not differ significantly from a random  
21 assignation, suggesting that only a single cluster exists or that the cluster 1 (north of the  
22 Garonne) is poorly differentiated from cluster 2 between the Garonne and the high-speed  
23 railway (Figure 5.C).

24                    Although the development of the industrial area and the building of the high-speed railway do  
25 not directly threaten the *E. calamita* survival in the study site (all  $p_e = 0$ ) (figure 6.F), it will

1 restrain the species' displacement capabilities and reduce the global population size  
2 (respectively, average population size within the focal patches are 2907, 2635 and 2166  
3 individuals). In addition, figure 8.F highlights the central role of patch 50 as a stepping-stone  
4 patch, which allows the maintenance of connectivity between the north (patches 29 and 32)  
5 and the south (patches 71 and 103). Such a map constitutes a powerful decision-making tool  
6 in the new ecological context of compensatory measures which will be taken in the context of  
7 large-scale landscape planning (Lanius, Kiss & Den Betsen 2013; Regnery, Couvet &  
8 Kerbirou 2013).

9

1 Model limitations:

2 By its structure, MetaConnect allows the user to take into account most of the requirements  
3 necessary for a complete and flexible PVA and decision-making tool (i.e. metapopulation  
4 dynamics and genetics) (Grimm *et al.* 2004; Baguette *et al.* 2013; Pe'er *et al.* 2013).

5 Currently, its main limitation comes from the landscape representation. In MetaConnect the  
6 landscape is represented using the patch-matrix approach, in which a cell is a suitable habitat  
7 or not. This approach will not be fully unrealistic for many species (Clobert *et al.* 2001; Urban  
8 *et al.* 2009; Pe'er *et al.* 2011). Furthermore, reproduction in the suitable habitat is assumed to  
9 be panmictic which is usually not true because patch shape and structure isolate or aggregate  
10 individuals within a patch and individual behaviour (territoriality, mating system,  
11 cooperation,...) may aggregate or isolate individuals within a patch (Doebeli & Koella 1994;  
12 Snyder & Chesson 2003; Ylonen, Pech & Davis 2003; Nonacs & Kapheim 2007). Further  
13 development of MetaConnect toolboxes would allow tackling this limitation of intra-patch  
14 spatial structuring by splitting individual use of space into daily movements and dispersal  
15 events (Mueller & Fagan 2008; Roshier, Doerr & Doerr 2008; Pe'er *et al.* 2013).

16 A second limitation is the way genetic mutation is modelled. Currently, the mutation model is  
17 very simple, just assuming that a new allele can occur at a given constant rate and that no  
18 reverse mutations are possible. Further toolbox development would allow various methods for  
19 modelling mutations to be incorporated (Willi, Van Buskirk & Hoffmann 2006; Neher 2013;  
20 Wray 2013) and in addition would permit simulation of the action of the genotypes on the  
21 individual phenotype (Montalvo *et al.* 1997; Mouquet *et al.* 2012; Moulherat *et al.*  
22 submitted).

23

## 1 Conclusion: model application and perspectives

2 European regulation requires spatial planners to evaluate precisely the impacts of  
3 developments on ecological network functioning. Baguette et al. (2013) recommended a  
4 robust workflow in that direction. The procedure comprises performing an analysis of  
5 metapopulation dynamics and dispersal over a landscape for each affected species to design  
6 sound ecological network functioning. MetaConnect provides an important tool that moves in  
7 this direction. Indeed, the user can easily build consensus networks for several species within  
8 the same study site and under the same framework with standardized and comparable outputs.  
9 However, such an approach does not yet incorporate the inter-specific interactions that could  
10 greatly change population dynamics and dispersal (Caswell 2001; Clobert *et al.* 2013).  
11 Further MetaConnect toolbox development will integrate basic inter-specific interactions such  
12 as competition, predation and parasitism.

13 Application of graph-theoretic connectivity is increasing at an exponential rate in ecology and  
14 conservation (Kindlmann & Burel 2008; Kadoya 2009; Moilanen 2011). In this framework,  
15 graph nodes represent habitat patches and graph edges represent the connectivity between  
16 patches (Urban & Keitt 2001). Whilst the mathematical background of graph theory is  
17 promising to deal efficiently with the ecological connectivity (Urban & Keitt 2001), the  
18 simplification made by modelling a metapopulation with a graph (Moilanen 2011) has the  
19 potential to lead to limited interpretation and operational efficiency (Kadoya 2009; Moilanen  
20 2011). Kadoya (2009) concluded that graph modelling of metapopulations provides little  
21 congruence with connectivity inferred from population genetic structure and Moilanen (2011)  
22 listed the limits of graph-theoretic connectivity in spatial ecology. With MetaConnect, as  
23 shown in our case study (figure 6.A-C), we provide an efficient tool to define habitat patches  
24 (nodes of a graph) with predictions of the demographic module and dispersal functionality  
25 between patches (graph's edges) with dispersal assessed from dispersal simulation or derived



1 from genetic estimates applicable from local to national scales and grid-based data. However,  
2 further development of MetaConnect and the development of a specific toolbox will allow  
3 that the graph does not model the metapopulation functioning as such, but to be used as a  
4 powerful analytical tool preventing the graph-theoretic connectivity analysis from biases  
5 described by Moilanen (2011).

6 We conclude by highlighting the recent call for a new generation of models that begin to  
7 provide predictive systems ecology (Evans, Norris & Benton 2012; Evans *et al.* 2013). This  
8 call argued that, while in a few sub-disciplines such as dynamic vegetation modelling and  
9 climate change modelling we have already developed a capacity for simulating complex  
10 systems, typically we lack such a predictive modelling capability elsewhere in ecological and  
11 evolutionary disciplines (Moorcroft, Hurtt & Pacala 2001; Evans, Norris & Benton 2012;  
12 Hoban, Bertorelle & Gaggiotti 2012; Purves *et al.* 2013; Bocedi *et al.* 2014). The climate  
13 modelling community and the dynamic vegetation modelling communities both possess  
14 several models with which they can conduct inter-model comparisons, conduct cross-  
15 validations, etc (Evans, Norris & Benton 2012; Pe'er *et al.* 2013). This is also now true of the  
16 population genetics community, which has several software packages available (reviewed in  
17 Hoban, Bertorelle & Gaggiotti 2012). We believe that MetaConnect, together with the  
18 recently published software RangeShifter (Bocedi *et al.* 2014) and the integrative statistical  
19 inferences procedure proposed by Pagel & Schurr (2012), begin to address this challenge to  
20 develop complex systems models that can be used to inform policy in the sphere of spatial  
21 and landscape ecology.

22

1 Acknowledgement:

2 SM, EB, JC and MB were supported by the European project SCALES funded by the  
3 European Commission as *Large-scale Integrating Project* within FP7 under grant 226852.  
4 JC, JT, SP and MB were supported by EU FP6 Biodiversa ERANET TenLamas. JT and SP  
5 were supported by NERC. SM and MM were supported by the TerrOïko's R&D internal  
6 program. This work is part of the "Laboratoire d'Excellence" TULIP (ANR-10-LABX-41).

7

8 Where to find MetaConnect

9 MetaConnect (IDDN.FR.001.430001.000.S.C.2012.000.20600) is developed in C++ by SM  
10 and MM and runs exclusively in cloud-computing under UNIX. A Graphical User Interface  
11 (GUI) developed in OpenGL insures the access to MetaConnect from multiple platforms  
12 (currently available for Linux Centos7). MetaConnect is available for academic purposes  
13 contacting the authors (SM).

14

15

1 References:

- 2 Aben, J., Strubbe, D., Adriaensen, F., Palmer, S.C.F., Travis, J.M.J., Lens, L. & Matthysen, E.  
3 (2014) Simple individual-based models effectively represent Afrotropical forest bird  
4 movement in complex landscapes. *Journal of Applied Ecology*, on line.
- 5 Adriaensen, F., Chardon, J.P., De Blust, G., Swinnen, E., Villalba, S., Gulinck, H. &  
6 Matthysen, E. (2003) The application of 'least-cost' modelling as a functional  
7 landscape model. *Landscape and Urban Planning*, **64**, 233-247.
- 8 Baguette, M., Blanchet, S., Legrand, D., Stevens, V.M. & Turlure, C. (2013) Individual  
9 dispersal, landscape connectivity and ecological networks. *Biological Reviews*, **88**,  
10 310-326.
- 11 Barraquand, F., Inchausti, P. & Bretagnolle, V. (2009) Cognitive abilities of a central place  
12 forager interact with prey spatial aggregation in their effect on intake rate. *Animal*  
13 *Behaviour*, **78**, 505-514.
- 14 Beerli, P. & Felsenstein, J. (2001) Maximum likelihood estimation of a migration matrix and  
15 effective population sizes in n subpopulations by using a coalescent approach.  
16 *Proceedings of the National Academy of Sciences of the United States of America*, **98**,  
17 4563-4568.
- 18 Beissinger, S.R. & Westphal, M.I. (1998) On the use of demographic models of population  
19 viability in endangered species management. *Journal of Wildlife Management*, **62**,  
20 821-841.
- 21 Bocedi, G., Palmer, S.C.F., Pe'er, G., Heikkinen, R.K., Matsinos, Y.G., Watts, K. & Travis,  
22 J.M.J. (2014) RangeShifter: a platform for modelling spatial eco-evolutionary  
23 dynamics and species' responses to environmental changes. *Methods in Ecology and*  
24 *Evolution*, **5**, 388-396.

- 1 Botea, A., Müller, M. & Schaeffer, J. Near Optimal Hierarchical Path-Finding. University of  
2 Alberta, Edmonton.
- 3 Boyce, M.S. (1992) Population viability analysis. *Annual Review of Ecology and Systematics*,  
4 **23**, 481-506.
- 5 Brook, B.W., Burgman, M.A., Akcakaya, H.R., O'Grady, J.J. & Frankham, R. (2002a)  
6 Critiques of PVA ask the wrong questions: Throwing the heuristic baby out with the  
7 numerical bath water. *Conservation Biology*, **16**, 262-263.
- 8 Brook, B.W., Cannon, J.R., Lacy, R.C., Mirande, C. & Frankham, R. (1999) Comparison of  
9 the population viability analysis packages GAPPS, INMAT, RAMAS and VORTEX  
10 for the whooping crane (*Grus americana*). *Animal Conservation*, **2**, 23-31.
- 11 Brook, B.W., O'Grady, J.J., Chapman, A.P., Burgman, M.A., Akcakaya, H.R. & Frankham,  
12 R. (2000) Predictive accuracy of population viability analysis in conservation biology.  
13 *Nature*, **404**, 385-387.
- 14 Brook, B.W., Tonkyn, D.W., O'Grady, J.J. & Frankham, R. (2002b) Contribution of  
15 inbreeding to extinction risk in threatened species. *Conservation Ecology*, **6**.
- 16 Calabrese, J.M. & Fagan, W.F. (2004) A comparison-shopper's guide to connectivity metrics.  
17 *Frontiers in Ecology and the Environment*, **2**, 529-536.
- 18 Cardinale, B.J., Duffy, J.E., Gonzalez, A., Hooper, D.U., Perrings, C., Venail, P., Narwani,  
19 A., Mace, G.M., Tilman, D., Wardle, D.A., Kinzig, A.P., Daily, G.C., Loreau, M.,  
20 Grace, J.B., Larigauderie, A., Srivastava, D.S. & Naeem, S. (2012) Biodiversity loss  
21 and its impact on humanity. *Nature*, **486**, 59-67.
- 22 Caswell, H. (2001) *Matrix Population Models: construction, analysis and interpretation*.  
23 Sinauer Associates Inc, Sunderland.
- 24 Clobert, J., Baguette, M., Benton, T.G. & Bullock, J.M. (2013) *Dispersal Ecology and*  
25 *Evolution*. Oxford University Press.

- 1 Clobert, J., Danchin, E., Dhondt, A.A. & Nichols, J.D. (2001) *Dispersal*. Oxford University  
2 Press, Oxford.
- 3 Coulon, A., Aben, J., Palmer, S.C.F., Stevens, V.M., Strubbe, D., Lens, L., Matthysen, E.,  
4 Baguette, M. & Travis, J.M.J. (Submitted) The use of a stochastic movement  
5 simulator improves estimates of landscape connectivity.
- 6 Cross, P.C. & Beissinger, S.R. (2001) Using logistic regression to analyze the sensitivity of  
7 PVA models: a comparison of methods based on African wild dog models.  
8 *Conservation Biology*, **15**, 1335-1346.
- 9 de Mazancourt, C., Isbell, F., Larocque, A., Berendse, F., De Luca, E., Grace, J.B.,  
10 Haegeman, B., Polley, H.W., Roscher, C., Schmid, B., Tilman, D., van Ruijven, J.,  
11 Weigelt, A., Wilsey, B.J. & Loreau, M. (2013) Predicting ecosystem stability from  
12 community composition and biodiversity. *Ecology letters*, **16**, 617-625.
- 13 DeAngelis, D.L. & Mooij, W.M. (2005) Individual-based modeling of ecological and  
14 evolutionary processes. *Annual Review of Ecology Evolution and Systematics*, pp.  
15 147-168.
- 16 Dobson, A.P., Bradshaw, A.D. & Baker, A.J.M. (1997) Hopes for the future: Restoration  
17 ecology and conservation biology. *Science*, **277**, 515-522.
- 18 Doebeli, M. & Koella, J.C. (1994) Sex and population-dynamics. *Proceedings of the Royal  
19 Society of London Series B-Biological Sciences*, **257**, 17-23.
- 20 Earl, D.A. & Vonholdt, B.M. (2012) STRUCTURE HARVESTER: a website and program  
21 for visualizing STRUCTURE output and implementing the Evanno method.  
22 *Conservation Genetics Resources*, **4**, 359-361.
- 23 Evanno, G., Regnaut, S. & Goudet, J. (2005) Detecting the number of clusters of individuals  
24 using the software STRUCTURE: a simulation study. *Molecular Ecology*, **14**, 2611-  
25 2620.

- 1 Evans, M.R., Bithell, M., Cornell, S.J., Dall, S.R.X., Diaz, S., Emmott, S., Ernande, B.,  
2 Grimm, V., Hodgson, D.J., Lewis, S.L., Mace, G.M., Morecroft, M., Moustakas, A.,  
3 Murphy, E., Newbold, T., Norris, K.J., Petchey, O., Smith, M., Travis, J.M.J. &  
4 Benton, T.G. (2013) Predictive systems ecology. *Proceedings of the Royal Society B-  
5 Biological Sciences*, **280**.
- 6 Evans, M.R., Norris, K.J. & Benton, T.G. (2012) Predictive ecology: systems approaches  
7 Introduction. *Philosophical Transactions of the Royal Society B-Biological Sciences*,  
8 **367**, 163-169.
- 9 Fagan, W.F. & Holmes, E.E. (2006) Quantifying the extinction vortex. *Ecology letters*, **9**, 51-  
10 60.
- 11 Fahrig, L. (2003) Effects of habitat fragmentation on biodiversity. *Annual Review of Ecology  
12 Evolution and Systematics*, **34**, 487-515.
- 13 Ferriere, R., Sarrazin, F., Legendre, S. & Baron, J.P. (1996) Matrix population models applied  
14 to viability analysis and conservation: Theory and practice using the ULM software.  
15 *Acta Oecologica-International Journal of Ecology*, **17**, 629-656.
- 16 Foltete, J.C., Clauzel, C. & Vuidel, G. (2012) A software tool dedicated to the modelling of  
17 landscape networks. *Environmental Modelling & Software*, **38**, 316-327.
- 18 Frank, B.M. & Baret, P.V. (2013) Simulating brown trout demogenetics in a river/nursery  
19 brook system: The individual-based model DemGenTrout. *Ecological modelling*, **248**,  
20 184-202.
- 21 Gilpin, M.E. & Soulé, M.E. (1986) Minimum viable populations: processes of extinction.  
22 *Conservation Biology: The Science of Security and Diversity* (ed. M.E. Soulé), pp. 19-  
23 34. Sinauer Associates, Sunderland.

- 1 Grimm, V., Lorek, H., Finke, J., Koester, F., Malachinski, M., Sonnenschein, M., Moilanen,  
2 A., Storch, I., Singer, A., Wissel, C. & Frank, K. (2004) META-X: Generic Software  
3 for Metapopulation Viability Analysis. *Biodiversity and conservation*, **13**, 165-188.
- 4 Hoban, S., Bertorelle, G. & Gaggiotti, O.E. (2012) Computer simulations: tools for population  
5 and evolutionary genetics. *Nature Reviews Genetics*, **13**, 110-122.
- 6 Ingvarsson, P.K. (2001) Restoration of genetic variation lost - The genetic rescue hypothesis.  
7 *Trends in Ecology & Evolution*, **16**, 62-63.
- 8 IUCN (2013) IUCN Red List of threatened species.
- 9 Kadoya, T. (2009) Assessing functional connectivity using empirical data. *Population*  
10 *Ecology*, **51**, 5-15.
- 11 Keller, L.F. & Waller, D.M. (2002) Inbreeding effects in wild populations. *Trends in Ecology*  
12 *& Evolution*, **17**, 230-241.
- 13 Kindlmann, P. & Burel, F. (2008) Connectivity measures: a review. *Landscape Ecology*, **23**,  
14 879-890.
- 15 Lacy, R.C., Borbat, M. & Pollak, J.P. (2009) Vortex: A stochastic simulation of the extinction  
16 process. Chicago Zoological Society, Brookfield.
- 17 Lanius, D.R., Kiss, E. & Den Betsen, J.W. (2013) Aligning Biodiversity Compensation and  
18 REDD+: a primer on integrating private sector conservation financing schemes in the  
19 tropics and sub-tropics. (ed. I. NL). Amsterdam.
- 20 Legendre, S. & Clobert, J. (1995) ULM, a software for conservation and evolutionary  
21 biologists. *Journal of Applied Statistics*, **22**, 817-834.
- 22 Legendre, S., Clobert, J., Moller, A.P. & Sorci, G. (1999) Demographic Stochasticity and  
23 Social Mating System in the Process of Extinction of Small Populations: The Case of  
24 Passerines Introduced to New Zealand. *The American Naturalist*, **153**, 449-463.

- 1 Letcher, B.H., Priddy, J.A., Walters, J.R. & Crowder, L.B. (1998) An individual-based,  
2 spatially-explicit simulation model of the population dynamics of the endangered red-  
3 cockaded woodpecker, *Picoides borealis*. *Biological Conservation*, **86**, 1-14.
- 4 Lindenmayer, D.B., Burgman, M.A., Akcakaya, H.R., Lacy, R.C. & Possingham, H.P. (1995)  
5 A review of the generic computer-prgrams ALEX, RAMAS/SPACE and VORTEX  
6 for modeling the viability of wildlife metapopulations. *Ecological modelling*, **82**, 161-  
7 174.
- 8 Manel, S. & Holderegger, R. (2013) Ten years of landscape genetics. *Trends in Ecology &*  
9 *Evolution*, **28**, 614-621.
- 10 Manel, S., Schwartz, M.K., Luikart, G. & Taberlet, P. (2003) Landscape genetics: combining  
11 landscape ecology and population genetics. *Trends in Ecology & Evolution*, **18**, 189-  
12 197.
- 13 Millenium Ecosystem Assessment (2005) Biodiversity Synthesis. *Ecosystem and Human*  
14 *Well-being* (ed. World Ressource Institute).
- 15 Moilanen, A. (2011) On the limitations of graph-theoretic connectivity in spatial ecology and  
16 conservation. *Journal of Applied Ecology*, **48**, 1543-1547.
- 17 Moilanen, A. & Nieminen, M. (2002) Simple connectivity measures in spatial ecology.  
18 *Ecology*, **83**, 1131-1145.
- 19 Montalvo, A.M., Williams, S.L., Rice, K.J., Buchmann, S.L., Cory, C., Handel, S.N., Nabhan,  
20 G.P., Primack, R. & Robichaux, R.H. (1997) Restoration biology: A population  
21 biology perspective. *Restoration Ecology*, **5**, 277-290.
- 22 Moorcroft, P.R., Hurtt, G.C. & Pacala, S.W. (2001) A method for scaling vegetation  
23 dynamics: The ecosystem demography model (ED). *Ecological Monographs*, **71**, 557-  
24 585.



- 1 Moulherat, S., Chaine, A., Mangin, A., Aubret, F., Sinervo, B. & Clobert, J. (submitted) What  
2 genetic mechanisms underlying mating strategy expression maintain trimorphism in a  
3 rock-paper-scissors game? *The American Naturalist*.
- 4 Mouquet, N., Devictor, V., Meynard, C.N., Munoz, F., Bersier, L.F., Chave, J., Couteron, P.,  
5 Dalecky, A., Fontaine, C., Gravel, D., Hardy, O.J., Jabot, F., Lavergne, S., Leibold,  
6 M., Mouillot, D., Munkemuller, T., Pavoine, S., Prinzing, A., Rodrigues, A.S.L.,  
7 Rohr, R.P., Thebault, E. & Thuiller, W. (2012) Ecophylogenetics: advances and  
8 perspectives. *Biological Reviews*, **87**, 769-785.
- 9 Mueller, T. & Fagan, W.F. (2008) Search and navigation in dynamic environments - from  
10 individual behaviors to population distributions. *Oikos*, **117**, 654-664.
- 11 Naujokaitis-Lewis, I.R., Curtis, J.M.R., Arcese, P. & Rosenfeld, J. (2009) Sensitivity  
12 Analyses of Spatial Population Viability Analysis Models for Species at Risk and  
13 Habitat Conservation Planning. *Conservation Biology*, **23**, 225-229.
- 14 Neher, R.A. (2013) Genetic Draft, Selective Interference, and Population Genetics of Rapid  
15 Adaptation. *Annual Review of Ecology, Evolution, and Systematics*, Vol 44 (ed. D.J.  
16 Futuyma), pp. 195-215.
- 17 Noel, F., Machon, N. & Robert, A. (2013) Integrating demographic and genetic effects of  
18 connections on the viability of an endangered plant in a highly fragmented habitat.  
19 *Biological Conservation*, **158**, 167-174.
- 20 Nonacs, P. & Kapheim, K.M. (2007) Social heterosis and the maintenance of genetic  
21 diversity. *Journal of Evolutionary Biology*, **20**, 2253-2265.
- 22 Pagel, J. & Schurr, F.M. (2012) Forecasting species ranges by statistical estimation of  
23 ecological niches and spatial population dynamics. *Global Ecology and Biogeography*,  
24 **21**, 293-304.

- 1 Palmer, S.C.F., Coulon, A. & Travis, J.M.J. (2011) Introducing a 'stochastic movement  
2 simulator' for estimating habitat connectivity. *Methods in Ecology and Evolution*.
- 3 Palmer, S.C.F., Coulon, A. & Travis, J.M.J. (2014) Inter-individual variability in dispersal  
4 behaviours impacts connectivity estimates. *Oikos*, no-no.
- 5 Pe'er, G., Henle, K., Dislich, C. & Frank, K. (2011) Breaking Functional Connectivity into  
6 Components: A Novel Approach Using an Individual-Based Model, and First  
7 Outcomes. *Plos One*, **6**.
- 8 Pe'er, G. & Kramer-Schadt, S. (2008) Incorporating the perceptual range of animals into  
9 connectivity models. *Ecological modelling*, **213**, 73-85.
- 10 Pe'er, G., Matsinos, Y.G., Johst, K., Franz, K.W., Turlure, C., Radchuk, V., Malinowska,  
11 A.H., Curtis, J.M.R., Naujokaitis-Lewis, I., Wintle, B.A. & Henle, K. (2013) A  
12 Protocol for Better Design, Application, and Communication of Population Viability  
13 Analyses. *Conservation Biology*, **27**, 644-656.
- 14 Piou, C. & Prevost, E. (2012) A demo-genetic individual-based model for Atlantic salmon  
15 populations: Model structure, parameterization and sensitivity. *Ecological modelling*,  
16 **231**, 37-52.
- 17 Pritchard, J.K., Stephens, M. & Donnelly, P. (2000) Inference of population structure using  
18 multilocus genotype data. *Genetics*, **155**, 945-959.
- 19 Purves, D., Scharlemann, J., Harfoot, M., Newbold, T., Tittensor, D.P., Hutton, J. & Emmott,  
20 S. (2013) Time to model all life on Earth. *Nature*, **493**, 295-297.
- 21 R Development Core Team (2005) R: A language and environment for statistical computing.  
22 R foundation for Statistical Computing, Vienna.
- 23 Radchuk, V., Johst, K., Groeneveld, J., Grimm, V. & Schtickzelle, N. (2013) Behind the  
24 scenes of population viability modeling: Predicting butterfly metapopulation dynamics  
25 under climate change. *Ecological modelling*, **259**, 62-73.

- 1 Reed, J.M., Mills, L.S., Dunning, J.B., Menges, E.S., McKelvey, K.S., Frye, R., Beissinger,  
2 S.R., Anstett, M.C. & Miller, P. (2002) Emerging issues in population viability  
3 analysis. *Conservation Biology*, **16**, 7-19.
- 4 Regnery, B., Couvet, D. & Kerbiriou, C. (2013) Offsets and Conservation of the Species of  
5 the EU Habitats and Birds Directives. *Conservation Biology*, **27**, 1335-1343.
- 6 Roshier, D.A., Doerr, V.A.J. & Doerr, E.D. (2008) Animal movement in dynamic landscapes:  
7 interaction between behavioural strategies and resource distributions. *Oecologia*, **156**,  
8 465-477.
- 9 Rowe, G. & Beebee, T.J.C. (2003) Population on the verge of a mutational meltdown? Fitness  
10 costs of genetic load for an amphibian in the wild. *Evolution*, **57**, 177-181.
- 11 Schtickzelle, N. & Baguette, M. (2004) Metapopulation viability analysis of the bog fritillary  
12 butterfly using RAMAS/GIS. *Oikos*, **104**, 277-290.
- 13 Snyder, R.E. & Chesson, P. (2003) Local dispersal can facilitate coexistence in the presence  
14 of permanent spatial heterogeneity. *Ecology letters*, **6**, 301-309.
- 15 Southgate, R. & Possingham, H. (1995) Modeling the reintroduction of the greater bilby  
16 *Macrotis lagotis* using the metapopulation model analysis of the likelihood of  
17 extinction (ALEX). *Biological Conservation*, **73**, 151-160.
- 18 Stevens, V.M. & Baguette, M. (2008) Importance of Habitat Quality and Landscape  
19 Connectivity for the Persistence of Endangered Natterjack Toads. *Conservation*  
20 *Biology*, **22**, 1194-1204.
- 21 Stevens, V.M., Verkenne, C., Vandewoestijne, S., Wesselingh, R.A. & Baguette, M. (2006)  
22 Gene flow and functional connectivity in the natterjack toad. *Molecular Ecology*, **15**,  
23 2333-2344.
- 24 Tallmon, D.A., Luikart, G. & Waples, R.S. (2004) The alluring simplicity and complex reality  
25 of genetic rescue. *Trends in Ecology & Evolution*, **19**, 489-496.

- 1 Taylor, P.D., Fahrig, L. & With, K.A. (2006) Landscape connectivity: a return to the basics.  
2 *Connectivity conservation* (eds K. Crooks & M.A. Sanjayan), pp. 29-43. University  
3 Press, Cambridge, Cambridge.
- 4 Urban, D. & Keitt, T. (2001) Landscape connectivity: A graph-theoretic perspective. *Ecology*,  
5 **82**, 1205-1218.
- 6 Urban, D.L., Minor, E.S., Treml, E.A. & Schick, R.S. (2009) Graph models of habitat  
7 mosaics. *Ecology letters*, **12**, 260-273.
- 8 Willi, Y., Van Buskirk, J. & Hoffmann, A.A. (2006) Limits to the adaptive potential of small  
9 populations. *Annual Review of Ecology Evolution and Systematics*, pp. 433-458.
- 10 Wray, G.A. (2013) Genomics and the Evolution of Phenotypic Traits. *Annual Review of*  
11 *Ecology, Evolution, and Systematics, Vol 44* (ed. D.J. Futuyma), pp. 51-72.
- 12 Ylonen, H., Pech, R. & Davis, S. (2003) Heterogeneous landscapes and the role of refuge on  
13 the population dynamics of a specialist predator and its prey. *Symposium on Costs of*  
14 *Coexistence*, pp. 349-369. Jyvaskyla, Finland.
- 15

1 **Table 1:** Nomenclature of MetaConnect’s main parameters and variables.

| Parameters and variables                         | Description                                            | Distribution law of random variables |
|--------------------------------------------------|--------------------------------------------------------|--------------------------------------|
| <i>Demographic characteristics</i>               |                                                        |                                      |
| $K$                                              | Carrying capacity*                                     |                                      |
| $k$                                              | Total competition coefficient                          |                                      |
| $s_i$                                            | Survival of individual from class $i$                  | Bernoulli                            |
| $F$                                              | Fecundity                                              | Poisson                              |
| $\sigma$                                         | Primary sex ratio                                      | Bernoulli                            |
| <i>Mating system</i>                             |                                                        |                                      |
| Mating system                                    | Mating system assumptions                              |                                      |
| $H_m$                                            | Male harem size                                        | Poisson                              |
| $H_f$                                            | Female harem size                                      | Poisson                              |
| <i>Genetics</i>                                  |                                                        |                                      |
| $L$                                              | Number of loci                                         |                                      |
| $A$                                              | Number of alleles per locus                            |                                      |
| $\mu$                                            | Mutation rate                                          |                                      |
| <i>Dispersal</i>                                 |                                                        |                                      |
| $p_d$                                            | Dispersal probability                                  | Bernoulli                            |
| Dispersal rule                                   | Dispersal algorithm                                    |                                      |
| <i>Initialization and model parameterization</i> |                                                        |                                      |
| $N_0$                                            | Initial number of individuals                          |                                      |
| $\sigma_0$                                       | Initial sex-ratio                                      |                                      |
| $f_a$                                            | Initial class structure                                |                                      |
| $T$                                              | Time steps                                             |                                      |
| $MC_l$                                           | Number of landscape random generations                 |                                      |
| $MC_d$                                           | Number of population dynamic simulations per landscape |                                      |

2

3 \* The carrying capacity  $K$  is derived from the competition coefficient and the competition  
4 assumption.

5

MetaConnect GUI v0.01β (201404301042)

File Style Tools Window

Others

Cartes  
 patch map.patch  
 k map.k

Structure  
 costs map.cost

Population  
 Patches  
 autodetect  
 Number of patches 0

Dispersion  
 Centres  
 rbGraphCenter  rbRandomCell  rbMap  
 patch center

Iterations

Matrice Leslie

$$\begin{pmatrix} (1 - dd)s_0F & s_0F \\ dds_1 & s_2 \end{pmatrix}$$

Properties

Age Ratio  
 Survival  
 Dispersal  
 Fecundity

CheckBox  
 CheckBox

|   | Males | Females |
|---|-------|---------|
| 0 | 0     | 7       |

Add Class Add Transition Generate Seq Del

A

B

C

D

MetaConnect Sequence

1

- 1 Figure 1: Screenshot example of the Legendre et al. (1999) passerine life cycle with two age-
- 2 class and two sexes that can be modelled with MetaConnect. The user defines the species life-
- 3 cycle as a combination of “bubbles” (add class) and “arrows” (add transition) (A). The species
- 4 life history traits are set up in the B section and the run setting is defined in the C. Then, the
- 5 MetaConnect workflow (D) and the Leslie matrix (E) are generated automatically.

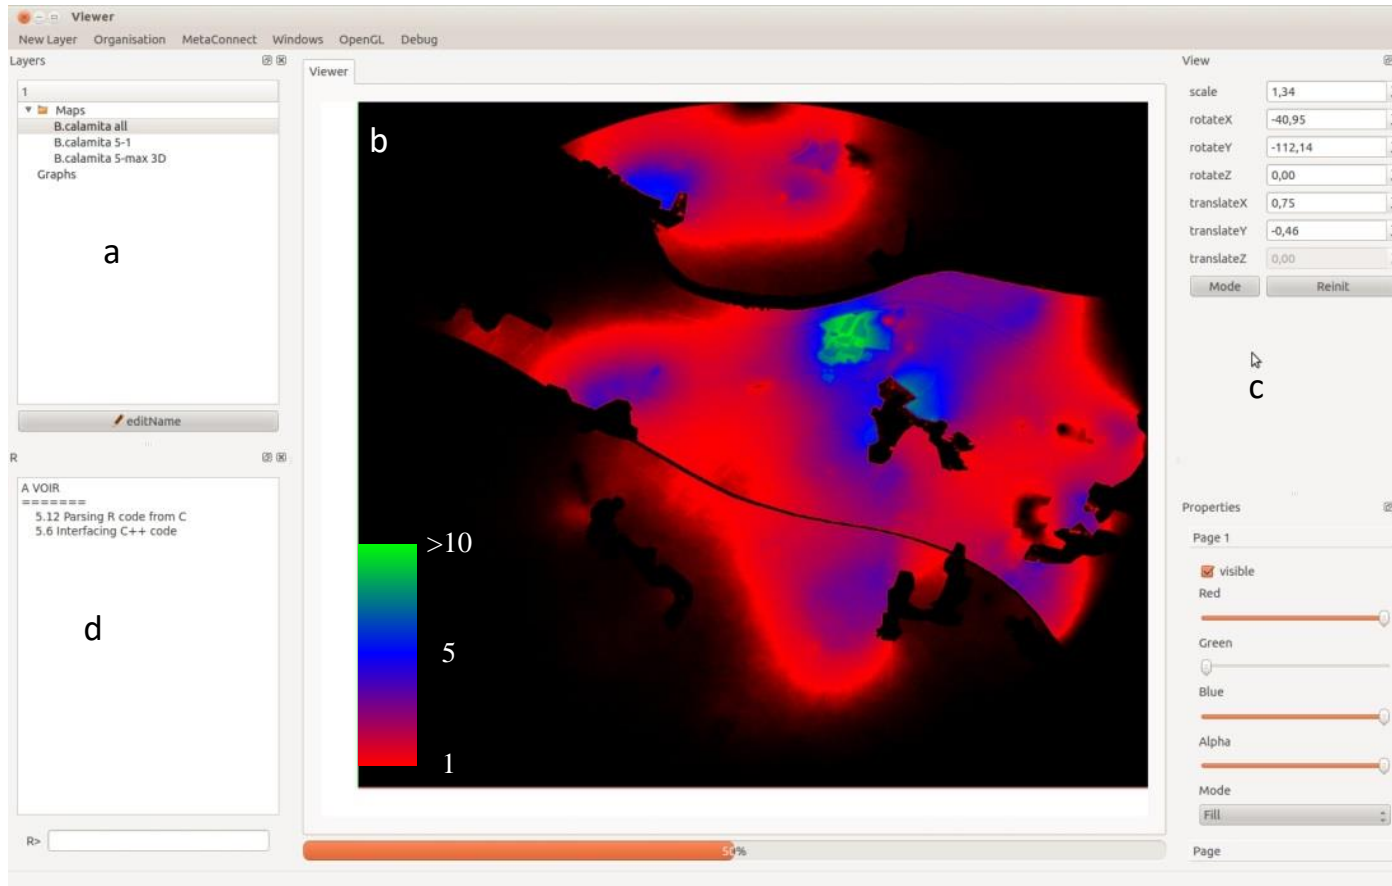

1

2 Figure 2: *E. calamita* landscape use during dispersal (indiv./year) estimated with MetaConnect. Data to be displayed or analysed are selected in  
 3 section *a* and displayed in *b* in two or three dimensions. Section *c* allows setting of the display options, and *d* is an R console to perform simple  
 4 analysis.



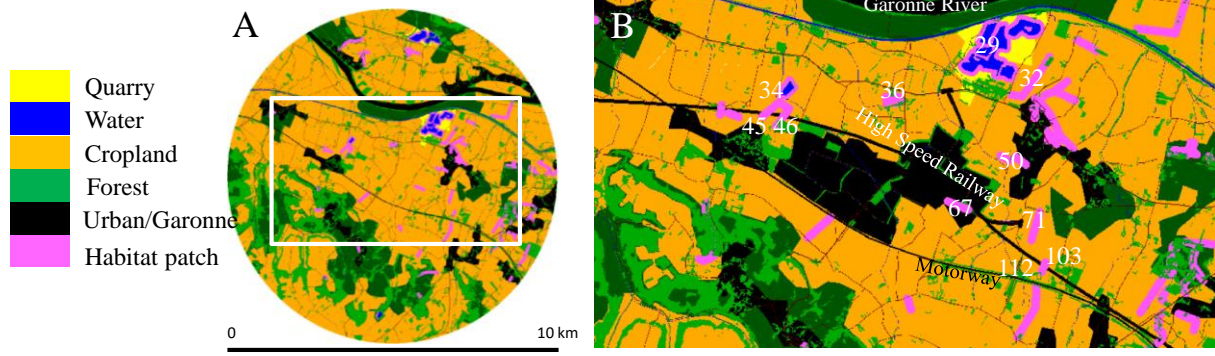

1

2 Figure 3: Site of industrial and transport development in south western France close to Agen.

3 Panel A presents the complete study site used for MetaConnect simulations, rasterized to a  
4 grid of 10m x 10m cells. Panel B shows enlarged the future development of an industrial area  
5 and of a high-speed railway. Our analysis is focused on the patches numbered in white. Patch  
6 67 will be destroyed by the industrial area development. Patches 45, 46 and 112 do not  
7 currently exist, but will appear with the building of the high-speed railway as a result of the  
8 fragmentation of respectively patches 34 (split into 34, 45 and 46) and 103 (split into 103 and  
9 112).

10

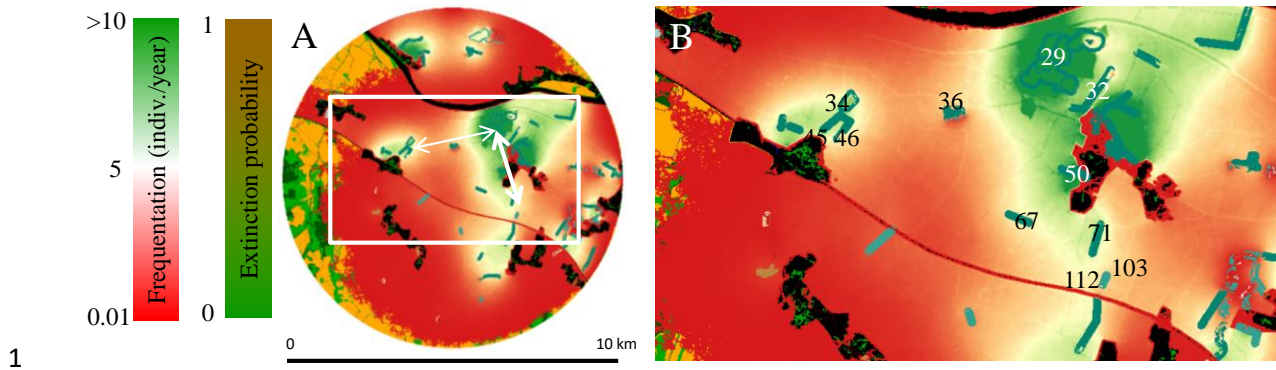

2 Figure 4: MetaConnect output layers of patch extinction probabilities and mean cell  
3 frequentation during efficient dispersal events. At the global scale, dispersing individuals  
4 follow two main corridors (white arrows in panel A): a major one along the north-south axis  
5 and a minor one along the east-west axis.

6

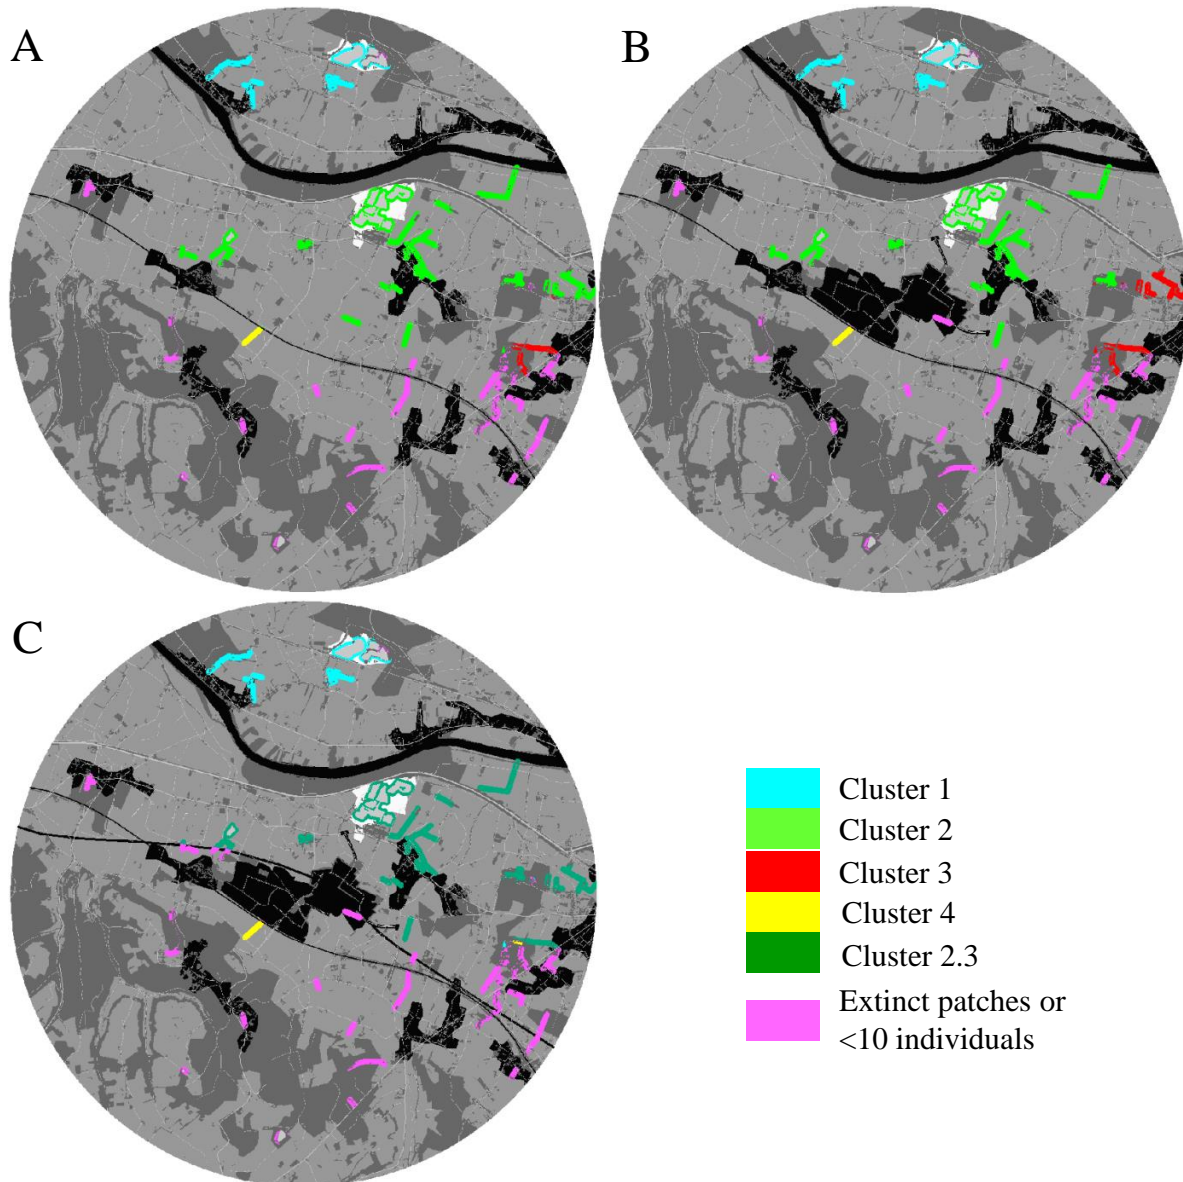

1

2 Figure 5: Genetic clustering of the suitable patches for *E. calamita*. The development of the  
3 industrial area (B) does not change the genetic structure of the *E. calamita* population from  
4 the current situation (A). 4 clusters are identified and separated by the Garonne (isolating  
5 clusters 1 and 2), a forest (barrier between cluster 2 and 3) and the motorway (separating  
6 cluster 2 from 4). The addition of the high-speed railway (C) would modify the genetic  
7 exchanges and only two clusters would be kept (cluster 1 and 4). The 2.3 cluster is neither  
8 aggregated to the cluster 1 nor 4 (all p.values > 0.05) due to the reduction of the number of  
9 individuals per patches and the change in the inter-patch genetic exchanges.

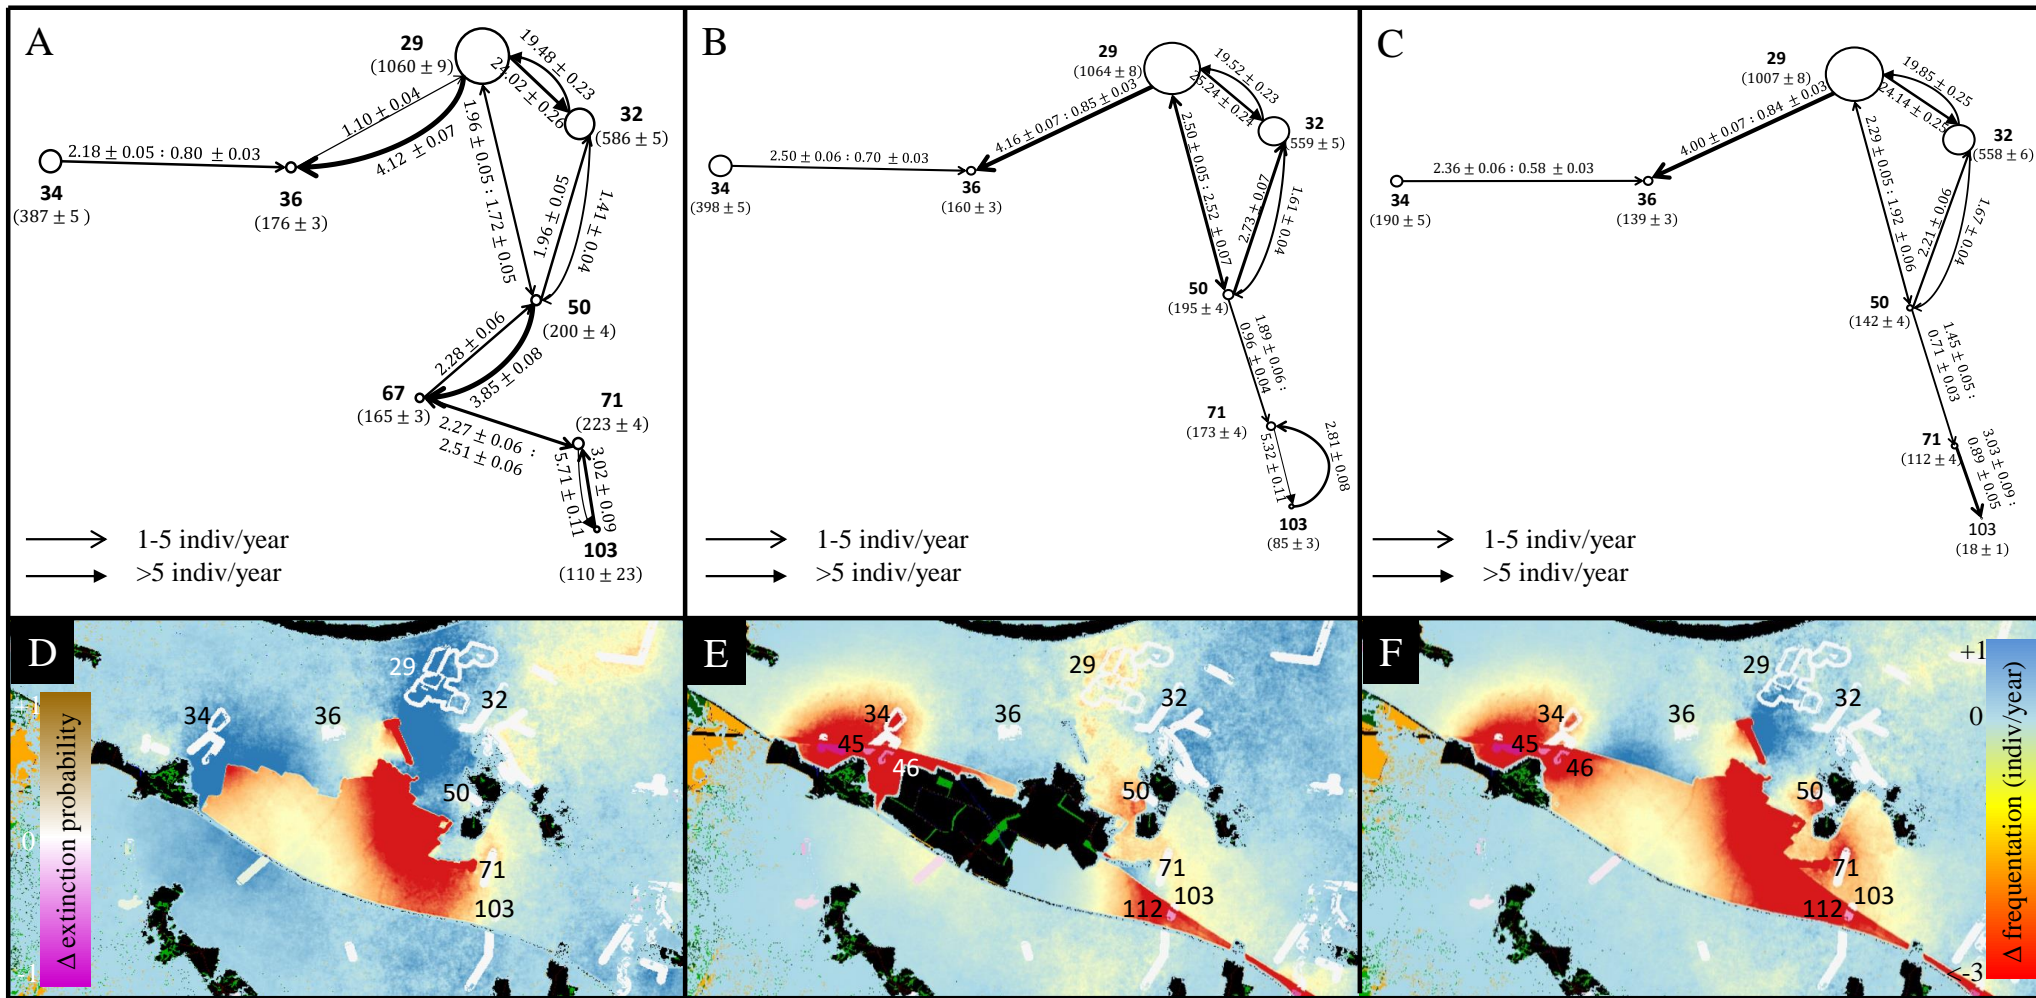



1 Figure 6: Graphical representation of the focal area metapopulation functioning derived from  
2 MetaConnect outputs for the current situation (A) with the industrial area (B) and with both  
3 the industrial area and the high-speed railway (C). Node sizes are proportional to patch  
4 population sizes (mean  $\pm$  SE). Arrows represent dispersal intensity (mean  $\pm$  SE) and direction  
5 (bidirectional arrows values correspond to smaller patch number to larger patch number flow:  
6 larger patch number to smaller). Maps represent the change in extinction probabilities per  
7 patch between scenario B and scenario A and similarly the change in cell occupancy during  
8 efficient dispersal. Panel D corresponds to the metapopulation functioning variations after the  
9 development of the industrial area. Panel E presents the variation between the situations after  
10 the industrial area development and after the high-speed railway building. Panel F  
11 summarizes the cumulative differences from the current metapopulation functioning to the  
12 expected functioning after the development of the industrial area and the high-speed railway.  
13
